# Supplementary material for: Withdrawal of TNF Antagonists in Patients with Inflammatory Bowel Disease in Remission: A Systematic Review and Meta-analysis of Randomized Controlled Trials
Source: Research Square preprint supplement (doi:10.21203/rs.3.rs-7842211/v1), 2025-11-11

**Supplementary Appendix**

**Table S1:** Detailed search strings for each database

| **Database** | **Search string** | **Records retrieved** |
| --- | --- | --- |
| PubMed/MEDLINE | (("Inflammatory Bowel Diseases"[MeSH Terms] OR "Crohn Disease"[MeSH Terms] OR "colitis, ulcerative"[MeSH Terms] OR (("inflammatories"[All Fields] OR "inflammatory"[All Fields]) AND ("bowel s"[All Fields] OR "bowell"[All Fields] OR "intestines"[MeSH Terms] OR "intestines"[All Fields] OR "bowel"[All Fields] OR "bowels"[All Fields]) AND "disease*"[All Fields]) OR "IBD"[All Fields] OR "crohn*"[All Fields] OR ("colitis, ulcerative"[MeSH Terms] OR ("colitis"[All Fields] AND "ulcerative"[All Fields]) OR "ulcerative colitis"[All Fields] OR ("ulcerative"[All Fields] AND "colitis"[All Fields]))) AND ("Tumor Necrosis Factor-alpha"[MeSH Terms] OR "antibodies, monoclonal"[MeSH Terms] OR "anti-TNF"[All Fields] OR ("TNF"[All Fields] AND "inhibitor*"[All Fields]) OR ("TNF"[All Fields] AND "antagon*"[All Fields]) OR ("TNF"[All Fields] AND "blocker*"[All Fields]) OR ("infliximab"[Supplementary Concept] OR "infliximab"[All Fields] OR "infliximab"[MeSH Terms] OR "infliximab s"[All Fields]) OR ("adalimumab"[Supplementary Concept] OR "adalimumab"[All Fields] OR "adalimumab"[MeSH Terms]) OR ("certolizumab pegol"[Supplementary Concept] OR "certolizumab pegol"[All Fields] OR "certolizumab"[All Fields] OR "certolizumab pegol"[MeSH Terms] OR ("certolizumab"[All Fields] AND "pegol"[All Fields])) OR "certolizumab pegol"[All Fields] OR ("golimumab"[Supplementary Concept] OR "golimumab"[All Fields] OR "golimumab s"[All Fields])) AND ("withdraw*"[All Fields] OR "discontinu*"[All Fields] OR "cessat*"[All Fields] OR "stop*"[All Fields] OR "de escalat*"[All Fields] OR "deescalat*"[All Fields] OR "taper*"[All Fields] OR "drug holiday"[All Fields])) AND (randomizedcontrolledtrial[Filter]) | 114 |
| Embase | ('inflammatory bowel disease'/exp OR 'crohn disease'/exp OR 'ulcerative colitis'/exp  OR "inflammatory bowel disease*" OR IBD OR Crohn* OR "ulcerative colitis")  AND  ('tumor necrosis factor alpha'/exp OR 'tumor necrosis factor antibody'/exp OR 'tumor necrosis factor inhibitor'/exp  OR "anti tnf" OR "tnf inhibitor*" OR "tnf antagon*" OR "tnf blocker*"  OR infliximab OR adalimumab OR certolizumab OR "certolizumab pegol" OR golimumab)  AND  (withdraw* OR discontinu* OR cessat* OR stop* OR de-escalat* OR deescalat* OR taper* OR "drug holiday") AND (randomizedcontrolledtrial[Filter]) | 673 |
| Cochrane Central Register of RCTs | ("inflammatory bowel disease" OR IBD OR "Crohn" OR "ulcerative colitis")  AND  ("anti-TNF" OR "TNF inhibitor" OR infliximab OR adalimumab OR certolizumab OR "certolizumab pegol" OR golimumab)  AND  (withdraw OR discontinuation OR cessation OR stop OR de-escalation OR taper OR "drug holiday") | 591 |
| Clinicaltrials.gov | ("inflammatory bowel disease" OR IBD OR Crohn OR "ulcerative colitis")  AND  (infliximab OR adalimumab OR certolizumab OR "certolizumab pegol" OR golimumab OR "anti-TNF" OR "TNF inhibitor") | 29 |

**Figure S1**: PRISMA flowchart showing the screening and study selection process

Records removed *before screening*

Duplicate records removed (n = 458)

Records identified from

PubMed/MEDLINE (n = 114)

Embase (n = 673)

Cochrane Central Register of RCTs (n = 591)

Clinicaltrials.gov (n = 29)

Total (n= 1407)

**Identification**

Records screened

(n = 949)

Records excluded

(n = 911)

Reports sought for retrieval

(n = 38)

**Screening**

Reports assessed for eligibility

(n = 38)

Reports excluded:

Single-arm studies, reviews, editorials, observational studies, and others (n = 34)

Studies included in qualitative synthesis

(n = 4)

Studies included in quantitative synthesis

(n = 4)

**Included**

**Figure S2**: Subgroup analysis (placebo control versus no placebo) for risk of relapse.


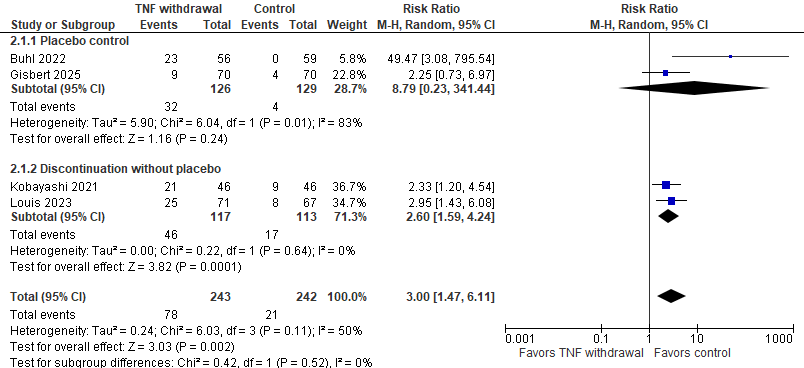


**Figure S3**: Subgroup analysis (placebo control versus no placebo) for sustained clinical remission.


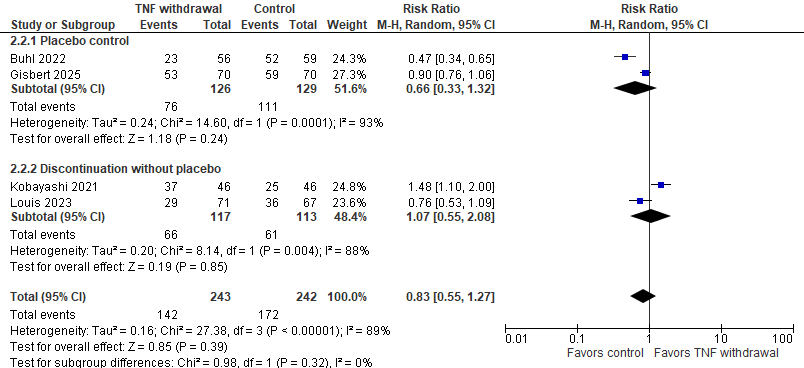

Supplement: Supplementary file 1 [file d389e593824afb43252194d4.docx]
